# Supplementary material for: Evolution of Carotenoid Content, Antioxidant Activity and Volatiles Compounds in Dried Mango Fruits (Mangifera Indica L.)
Source: PubMed Central journal article supplement (PMC7600135; doi:10.3390/foods9101424), 2020-10-09
Supplement: foods-09-01424-s001.pdf [file foods-09-01424-s001.pdf]

**Supplementary Table 1.** Volatile compounds ( $\mu\text{g}/\text{Kg}$  d.b.) in fresh and dried *Keitt* and *Osteen* mangoes.

|                           | Keitt                    |                       |                       |                           | Osteen                  |                         |                        |                         |
|---------------------------|--------------------------|-----------------------|-----------------------|---------------------------|-------------------------|-------------------------|------------------------|-------------------------|
|                           | Fresh                    | 50 °C                 | 60 °C                 | 70 °C                     | Fresh                   | 50 °C                   | 60 °C                  | 70 °C                   |
| <b>Acids</b>              |                          |                       |                       |                           |                         |                         |                        |                         |
| Acetic acid               | n.d. a                   | 1.4 $\pm$ 0.03b       | n.d. a                | 1.25 $\pm$ 0.03c          | 25.7 $\pm$ 0.6d         | 2.88 $\pm$ 0.07<br>b    | 4.7 $\pm$ 0.1c         | 1.38 $\pm$ 0.03a        |
| Butanoic acid             | 32 $\pm$ 2c              | 4.1 $\pm$ 0.3a        | 14.9 $\pm$ 1.1b       | 8.6 $\pm$ 0.6a            | 11.5 $\pm$ 0.8c         | 4.6 $\pm$ 0.3b          | 3.3 $\pm$ 0.2ab        | 1.6 $\pm$ 0.1a          |
| Hexanoic acid             | 51 $\pm$ 4b              | 2.7 $\pm$ 0.2a        | 6.7 $\pm$ 0.5a        | 3.2 $\pm$ 0.2a            | 5.6 $\pm$ 0.4c          | 3.0 $\pm$ 0.2b          | 1.4 $\pm$ 0.1a         | 0.79 $\pm$ 0.06a        |
| Heptanoic acid            | 3.3 $\pm$ 0.1d           | 2.6 $\pm$ 0.1c        | 1.8 $\pm$ 0.08b       | 0.73 $\pm$ 0.03a          | 3.4 $\pm$ 0.1c          | 0.77 $\pm$ 0.03<br>b    | 0.48 $\pm$ 0.02ab      | 0.24 $\pm$ 0.01a        |
| Octanoic acid             | 25 $\pm$ 1c              | 5.9 $\pm$ 0.3b        | 3.6 $\pm$ 0.2ab       | 1.29 $\pm$ 0.07a          | 7.3 $\pm$ 0.4c          | 1.8 $\pm$ 0.1b          | 1.03 $\pm$ 0.06ab      | 0.67 $\pm$ 0.04a        |
| Nonanoic acid             | 9.2 $\pm$ 0.5b           | 15.8 $\pm$ 0.8c       | 3.3 $\pm$ 0.2a        | 2.3 $\pm$ 0.1a            | 5.8 $\pm$ 0.3c          | 1.54 $\pm$ 0.08<br>b    | 1.01 $\pm$ 0.05ab      | 0.66 $\pm$ 0.04a        |
| Decanoic acid             | 32 $\pm$ 2c              | 8.7 $\pm$ 0.5b        | 8.3 $\pm$ 0.4ab       | 4.7 $\pm$ 0.2a            | 17.5 $\pm$ 0.9c         | 9.9 $\pm$ 0.5b          | 2.5 $\pm$ 0.1ab        | 3.2 $\pm$ 0.2a          |
| Dodecanoic acid           | 27 $\pm$ 1b              | n.d. a                | n.d. a                | n.d. a                    | 7.2 $\pm$ 0.3c          | 9.9 $\pm$ 0.4d          | 0.78 $\pm$ 0.03a       | 5 $\pm$ 0.2b            |
| Tetradecanoic acid        | 94 $\pm$ 4b              | n.d. a                | n.d. a                | 2.6 $\pm$ 0.1a            | 25.4 $\pm$ 1.2b         | 77 $\pm$ 4d             | 4.0 $\pm$ 0.2a         | 42 $\pm$ 2c             |
| Pentadecanoic acid        | 10.6 $\pm$ 0.5b          | n.d. a                | n.d. a                | n.d. a                    | 5.9 $\pm$ 0.3c          | 8.1 $\pm$ 0.4d          | 0.65 $\pm$ 0.03a       | 4.5 $\pm$ 0.2b          |
| Hexadecanoic acid         | 217 $\pm$ 9b             | 2.6 $\pm$ 0.1a        | 2.5 $\pm$ 0.1a        | 4.3 $\pm$ 0.2a            | 173 $\pm$ 7b            | 163 $\pm$ 7b            | 115 $\pm$ 5a           | 105 $\pm$ 5a            |
| Heptadecanoic acid        | n.d. a                   | 0.8 $\pm$ 0.02b       | n.d. a                | n.d. a                    | n.d. a                  | 2.86 $\pm$ 0.07<br>d    | 0.51 $\pm$ 0.01b       | 2.5 $\pm$ 0.06c         |
| Octadecanoic acid         | 48 $\pm$ 3b              | 2.7 $\pm$ 0.1a        | 1.4 $\pm$ 0.07a       | 1.3 $\pm$ 0.07a           | 22.9 $\pm$ 1.2b         | 19.6 $\pm$ 1.0b         | 2.7 $\pm$ 0.1a         | 20 $\pm$ 1b             |
| trans-9-Octadecenoic acid | n.d. a                   | 0.8 $\pm$ 0.02b       | 2.3 $\pm$ 0.05a       | 0.9 $\pm$ 0.02b           | n.d. a                  | 9.0 $\pm$ 0.2c          | 1.28 $\pm$ 0.03b       | 10.4 $\pm$ 0.2d         |
| Total                     | 549 $\pm$ 27b<br>10.53%d | 48 $\pm$ 3a<br>1.51%b | 45 $\pm$ 3a<br>0.90%a | 31.4 $\pm$ 1.7a<br>3.16%c | 312 $\pm$ 14c<br>0.84%a | 314 $\pm$ 14c<br>3.27%a | 139 $\pm$ 6a<br>8.44%b | 197 $\pm$ 9b<br>36.02%c |
| <b>Alcohols</b>           |                          |                       |                       |                           |                         |                         |                        |                         |
| Isoamylalcohol            | n.d. a                   | 17 $\pm$ 0.6c         | n.d. a                | 2.4 $\pm$ 0.09b           | n.d. a                  | 1.61 $\pm$ 0.06<br>b    | 6.1 $\pm$ 0.2c         | 1.5 $\pm$ 0.05b         |
| 1-Pentanol                | n.d. a                   | 1.9 $\pm$ 0.07c       | n.d. a                | 1.5 $\pm$ 0.06b           | n.d. a                  | n.d. a                  | n.d. a                 | 0.7 $\pm$ 0.03b         |
| cis-Penten-1-ol           | 47 $\pm$ 2b              | 1.5 $\pm$ 0.06a       | 3.7 $\pm$ 0.1a        | 0.8 $\pm$ 0.03a           | 5.6 $\pm$ 0.2d          | 3.5 $\pm$ 0.1c          | 1.9 $\pm$ 0.07b        | 0.72 $\pm$ 0.03a        |
| 1-Hexanol                 | 78 $\pm$ 3b              | 6.1 $\pm$ 0.3a        | 4.6 $\pm$ 0.2a        | 4.3 $\pm$ 0.2a            |                         | 3.5 $\pm$ 0.2c          | 1.9 $\pm$ 0.08b        | 1.1 $\pm$ 0.05b         |
| 1-Octanol                 | 55 $\pm$ 2c              | 18 $\pm$ 0.6b         | 5.7 $\pm$ 0.2a        | 3.9 $\pm$ 0.1a            | 191 $\pm$ 11b           | 4.4 $\pm$ 0.1a          | 4.0 $\pm$ 0.1a         | 2.94 $\pm$ 0.09a        |
| 1-Nonanol                 | 29.4 $\pm$ 0.7b          | 36 $\pm$ 0.9c         | 5.2 $\pm$ 0.1a        | 4.7 $\pm$ 0.1a            | 20.2 $\pm$ 0.5c         | 2.75 $\pm$ 0.07<br>b    | 1.2 $\pm$ 0.03a        | 1.09 $\pm$ 0.03a        |
| 3,6-Nonadien-1-ol         | 132 $\pm$ 7b             | 4.4 $\pm$ 0.2a        | 2.1 $\pm$ 0.1a        | 0.8 $\pm$ 0.04a           | 35 $\pm$ 2b             | 4.0 $\pm$ 0.2a          | 1.0 $\pm$ 0.05a        | 0.37 $\pm$ 0.02a        |

|                              |             |              |              |              |             |                  |              |              |
|------------------------------|-------------|--------------|--------------|--------------|-------------|------------------|--------------|--------------|
| 2,6-Nonadienol               | n.d. a      | 5.9 ± 0.1b   | n.d. a       | n.d. a       | n.d. a      | 2.47 ± 0.06c     | 0.51 ± 0.01b |              |
| 2-Phenylethylalcohol         | n.d. a      | 1.4 ± 0.03b  | 2.57 ± 0.06c | n.d. a       | n.d. a      | 0.35 ± 0.01<br>b | 0.4 ± 0.01b  | 0.24 ± 0.01b |
| 1-Dodecanol                  | 22 ± 1c     | 7.6 ± 0.4b   | 6.5 ± 0.3b   | 2.5 ± 0.1a   | 14.7 ± 0.7b | 16.2 ± 0.8b      | 4.2 ± 0.2a   | 6.5 ± 0.3a   |
| Total                        | 362 ± 16c   | 99 ± 3b      | 30 ± 1a      | 20.9 ± 0.8a  | 266 ± 14c   | 39 ± 2b          | 21.2 ± 0.8ab | 15.2 ± 0.6a  |
|                              | 6.96%d      | 3.12%c       | 0.61%a       | 2.10%b       | 0.72%b      | 0.40%a           | 1.29%c       | 2.77%d       |
| <b>Aldehydes</b>             |             |              |              |              |             |                  |              |              |
| Hexanal                      | n.d. a      | n.d. a       | n.d. a       | 2.9 ± 0.07b  | n.d. a      | n.d. a           | 6.6 ± 0.2c   | 2.93 ± 0.07b |
| Heptanal                     | n.d. a      | 18.7 ± 0.7d  | 8.8 ± 0.3c   | 3.7 ± 0.1b   | n.d. a      | n.d. a           | n.d. a       | 8.8 ± 0.3b   |
| 1-Octanal                    | 24.2 ± 0.7b | n.d. a       | n.d. a       | n.d. a       | 48 ± 1b     | n.d. a           | n.d. a       | 2.64 ± 0.08a |
| Nonanal                      | 115 ± 5b    | 208 ± 9c     | 52 ± 2a      | 67 ± 3a      | 160 ± 7c    | 56 ± 2b          | 29 ± 1a      | 36 ± 2a      |
| Furfuraldehyde               | 47 ± 2c     | 5.1 ± 0.3b   | n.d. a       | 4.4 ± 0.2ab  | 7.6 ± 0.4c  | n.d. a           | n.d. a       | 2.8 ± 0.2b   |
| Decanal                      | 40 ± 1d     | 21.7 ± 0.5c  | 10.4 ± 0.2a  | 18.5 ± 0.4b  | 91 ± 2c     | 13.2 ± 0.3a      | 10.2 ± 0.2a  | 4.5 ± 0.1b   |
| Benzaldehyde                 | 21.2 ± 0.8c | 10.4 ± 0.4b  | 18 ± 0.7c    | 7.5 ± 0.3a   | 244 ± 9b    | 3.9 ± 0.2a       | 3.7 ± 0.1a   | 1.96 ± 0.08a |
| trans-2-Nonenal              | n.d. a      | 5.7 ± 0.1d   | 2.1 ± 0.05b  | 2.6 ± 0.06c  | n.d. a      | 19.2 ± 0.5d      | 3.9 ± 0.09c  | 1.9 ± 0.05b  |
| 2,6-Nonadienal               | n.d. a      | 7.0 ± 0.2c   | 14 ± 0.3d    | 2.4 ± 0.06b  | n.d. a      | 8.8 ± 0.2d       | 2.11 ± 0.05c | 1.53 ± 0.04b |
| Total                        | 248 ± 10b   | 277 ± 11b    | 105 ± 4a     | 109 ± 4a     | 551 ± 20c   | 101 ± 4b         | 55 ± 2a      | 63 ± 2b      |
|                              | 4.75%b      | 8.71%c       | 2.13%a       | 11.02%d      | 1.49%a      | 1.05%a           | 3.37%c       | 11.45%d      |
| <b>Aromatic Hydrocarbons</b> |             |              |              |              |             |                  |              |              |
| 2,5-Dimethylstyrene          | 41 ± 1c     | 18.2 ± 0.7b  | 54 ± 2d      | 3.6 ± 0.1a   | 193 ± 7c    | 26 ± 1b          | 4.0 ± 0.2a   | n.d. a       |
|                              | 0.78%c      | 0.57%b       | 1.09%d       | 0.36%a       | 0.52%b      | 0.27%a           | 0.24%a       | 0%a          |
| <b>Esters</b>                |             |              |              |              |             |                  |              |              |
| Ethyl butanoate              | n.d. a      | n.d. a       | 225 ± 5c     | 94 ± 2b      | n.d. a      | 153 ± 4b         | n.d. a       | n.d. a       |
| Ethyl hexanoate              | n.d. a      | 10.5 ± 0.5b  | 41 ± 2d      | 17.2 ± 0.8c  | n.d. a      | 35 ± 2b          | n.d. a       | 0.92 ± 0.04a |
| Ethyl heptanoate             | n.d. a      | 6.1 ± 0.2d   | 4.8 ± 0.1c   | 1.37 ± 0.03b | n.d. a      | n.d. a           | n.d. a       | n.d. a       |
| Ethyl octanoate              | 34 ± 2b     | 26 ± 1b      | 83 ± 4c      | 7.7 ± 0.4b   | 11.8 ± 0.5b | 22 ± 1c          | 1.45 ± 0.07a | n.d. a       |
| cis-3-Hexenyl Butyrate       | 61 ± 2c     | 4.7 ± 0.2a   | 23.6 ± 0.9b  | n.d. a       | n.d. a      | n.d. a           | n.d. a       | n.d. a       |
| Ethyl 3-hydroxybutanoate     | 25 ± 1c     | 1.52 ± 0.08a | 5.3 ± 0.3b   | n.d. a       | 113 ± 6b    | n.d. a           | n.d. a       | n.d. a       |
| -Butyrolactone               | 9.3 ± 0.4a  | 13.0 ± 0.5b  | 17.3 ± 0.7c  | 11.8 ± 0.5b  | 4.7 ± 0.2c  | 8.8 ± 0.3b       | 26 ± 1c      | 7.1 ± 0.3b   |
| Ethyl decanoate              | 17 ± 1c     | 4.5 ± 0.3a   | 8.2 ± 0.6b   | 3.3 ± 0.2a   | n.d. a      | 5.4 ± 0.4c       | 0.9 ± 0.06b  | 0.67 ± 0.05b |
| Ethyl benzoate               | 3.2 ± 0.2c  | 1.12 ± 0.06b | 3.3 ± 0.2c   | n.d. a       | 18 ± 1b     | 1.65 ± 0.08a     | n.d. a       | n.d. a       |
| Diethyl succinate            | n.d. a      | 0.8 ± 0.02b  | 5.2 ± 0.1d   | 2.28 ± 0.05c | n.d. a      | 3.69 ± 0.09c     | n.d. a       | 0.78 ± 0.02b |
| Ethyl dodecanoate            | 12.7 ± 0.6b | 4.7 ± 0.2a   | 19.9 ± 0.9c  | 4.9 ± 0.2a   | n.d. a      | 4.0 ± 0.2c       | 0.52 ± 0.02b | 0.46 ± 0.02b |
| γ-Octalattone                | 257 ± 11b   | 14.7 ± 0.7a  | 26 ± 1a      | 13.9 ± 0.6a  | n.d. a      | 0.69 ± 0.03c     | 0.19 ± 0.01b | 0.16 ± 0.01b |
| Ethyl tetradecanoate         | 22 ± 1ab    | 22 ± 1a      | 101 ± 4c     | 32 ± 1b      | 3.9 ± 0.2b  | 19.0 ± 0.8d      | 6.9 ± 0.3c   | 1.9 ± 0.08a  |
| Ethyl pentadecanoate         | n.d. a      | 0.57 ± 0.01b | n.d. a       | n.d. a       | n.d. a      | 0.6 ± 0.01c      | 0.16 ± 0.01b | 0.10 ± 0.01b |
| Ethyl hexadecanoate          | 10.1 ± 0.6c | 6.4 ± 0.4b   | 11.2 ± 0.7c  | 3.7 ± 0.2a   | 8.7 ± 0.5b  | 9.9 ± 0.6b       | 3 ± 0.2a     | 2.0 ± 0.1a   |
| Ethyl octadecanoate          | n.d. a      | n.d. a       | n.d. a       | n.d. a       | n.d. a      | 1.0 ± 0.02c      | 0.51 ± 0.01b | 0.25 ± 0.01b |

|                       |       |                         |                       |                        |                        |                         |                        |                        |                        |
|-----------------------|-------|-------------------------|-----------------------|------------------------|------------------------|-------------------------|------------------------|------------------------|------------------------|
|                       | Total | 452 ± 21c<br>8.68%b     | 117 ± 5a<br>3.68%a    | 575 ± 21d<br>11.66%c   | 192 ± 7b<br>19.31%d    | 159 ± 8c<br>0.43%a      | 266 ± 9d<br>2.76%c     | 39 ± 2b<br>2.39%c      | 14.3 ± 0.6a<br>2.62%c  |
| <b>Ketones</b>        |       |                         |                       |                        |                        |                         |                        |                        |                        |
| Geranyl acetone       |       | 142 ± 5b                | 4.6 ± 0.2a            | 3.50 ± 0.13a           | 1.88 ± 0.07a           | 32 ± 1c                 | 8.1 ± 1.2b             | 6.4 ± 0.2b             | 0.88 ± 0.03a           |
| β-Ionone              |       | 78 ± 3b                 | 3.9 ± 0.1a            | 6.5 ± 0.2a             | 0.91 ± 0.03a           | 15.2 ± 0.6b             | 0.9 ± 0.6a             | 0.31 ± 0.01a           | 0.18 ± 0.01a           |
|                       | Total | 220 ± 8b<br>4.23% c     | 8.5 ± 0.3a<br>0.27%b  | 10.0 ± 0.4a<br>0.20%a  | 2.8 ± 0.1a<br>0.28%b   | 48 ± 2c<br>0.13%b       | 9.1 ± 1.7b<br>0.09%a   | 6.7 ± 0.2b<br>0.41%d   | 1.06 ± 0.04a<br>0.19%c |
| <b>Monoterpenes</b>   |       |                         |                       |                        |                        |                         |                        |                        |                        |
| α-pinene              |       | 2192 ± 67d              | 1134 ± 35b            | 1340 ± 41c             | 403 ± 12a              | 26015 ± 800b            | 2908 ± 89b             | 994 ± 31a              | 193 ± 6a               |
| α-fenchene            |       | 311 ± 12d               | 921 ± 35c             | 1772 ± 68d             | 92 ± 4a                | 3207 ± 122b             | 4165 ± 159c            | 90 ± 3a                | 46.9 ± 1.8a            |
| α-terpinene           |       | 163 ± 4d                | 30 ± 0.7b             | 46 ± 1c                | 9.0 ± 0.2a             | 310 ± 7d                | 209 ± 5c               | 131 ± 3b               | n.d. a                 |
| D-Limonene            |       | 132 ± 6d                | 46 ± 2c               | 33 ± 1b                | 12.0 ± 0.5a            | 1128 ± 50c              | 158 ± 7b               | 38 ± 2a                | n.d. a                 |
| β-Phellandrene        |       | 95 ± 4c                 | 66 ± 3b               | 127 ± 5d               | 22 ± 1a                | 524 ± 23b               | 43 ± 2a                | 8.5 ± 0.4a             | n.d. a                 |
| γ-Terpinene           |       | 188 ± 5c                | 7.7 ± 0.2a            | 26.8 ± 0.6b            | 4.6 ± 0.1a             | 33.7 ± 0.8c             | 23.5 ± 0.6b            | 1.13 ± 0.03a           | n.d. a                 |
| δ-3-carene            |       | n.d. a                  | 3.6 ± 0.2a            | 56 ± 2b                | 1.32 ± 0.06a           | n.d. a                  | 18.9 ± 0.8b            | 0.88 ± 0.04a           | n.d. a                 |
| β-ocimene             |       | n.d. a                  | 19.5 ± 0.9b           | 55 ± 3c                | 4.8 ± 0.2a             | n.d. a                  | 25 ± 1c                | 2.9 ± 0.1b             | 0.18 ± 0.01a           |
| α-terpinolen          |       | 199 ± 5c                | 141 ± 3b              | 494 ± 12d              | 28.4 ± 0.7a            | 1959 ± 47c              | 492 ± 12b              | 58.6 ± 1.4a            | 0.86 ± 0.02            |
| Isoterpinolene        |       | 14.1 ± 0.5a             | 46 ± 2c               | 19.1 ± 0.7ab           | 17.6 ± 0.7b            | 29 ± 1c                 | 45 ± 2d                | 5.3 ± 0.2b             |                        |
|                       | Total | 3294 ± 103c<br>63.24 %b | 2416 ± 82b<br>75.96%c | 3969 ± 135d<br>80.44%d | 595 ± 19a<br>59.94%a   | 33205 ± 251c<br>89.57%c | 8088 ± 278b<br>84.19%b | 1330 ± 41b<br>80.80%b  | 241 ± 8a<br>43.90%a    |
| <b>Phenols</b>        |       |                         |                       |                        |                        |                         |                        |                        |                        |
| Phenol                |       | 9.57 ± 0.66c<br>0.18% b | 1.6 ± 0.1a<br>0.05%a  | 1.25 ± 0.09a<br>0.03%a | 0.57 ± 0.04a<br>0.06%a | 5.7 ± 0.4b<br>0.02%a    | 1.06 ± 0.07a<br>0.01%a | 0.79 ± 0.05a<br>0.05%b | 0.45 ± 0.03a<br>0.08%b |
| <b>Sesquiterpenes</b> |       |                         |                       |                        |                        |                         |                        |                        |                        |
| α-Copaene             |       | n.d. a                  | 45 ± 1d               | 26.1 ± 0.6c            | 8.1 ± 0.2b             | n.d. a                  | 2.41 ± 0.06<br>b       | n.d. a                 | n.d. a                 |
| α-Gurjunene           |       | 12.3 ± 0.5c             | 8.82 ± 0.39b          | 9.15 ± 0.40b           | n.d. a                 | 30.07 ± 1.33c           | 14.02 ± 0.62<br>b      | 2.3 ± 0.1a             | n.d. a                 |
| β-Caryophyllen        |       | n.d. a                  | 64 ± 1d               | 51 ± 1c                | 13.7 ± 0.3b            | 113 ± 2.7b              | 450 ± 11c              | 30 ± 0.7c              | 15.9 ± 0.4c            |
| Humulen               |       | n.d. a                  | 3.45 ± 0.08d          | 4.1 ± 0.1c             | 1.58 ± 0.04b           | 80 ± 2c                 | 11.4 ± 0.3b            | 1.87 ± 0.04a           | n.d. a                 |
| α-Caryophyllene       |       | 9.1 ± 0.2b              | 33 ± 0.8d             | 24.6 ± 0.6c            | 6.9 ± 0.2a             | 1675 ± 40c              | 212 ± 5b               | 13.4 ± 0.3a            | 0.30 ± 0.01a           |
| β-Selinene            |       | 11.8 ± 0.5b             | 33 ± 1d               | 25 ± 1c                | 5.4 ± 0.2a             | 325 ± 14c               | 63 ± 3b                | 2.02 ± 0.09a           | n.d. a                 |
| Valencene             |       | n.d. a                  | 3.05 ± 0.07d          | 2.76 ± 0.07c           | 1.08 ± 0.03b           | 33.8 ± 0.8c             | 3.82 ± 0.09<br>b       | n.d. a                 | n.d. a                 |
| α-Selinene            |       | n.d. a                  | 4.4 ± 0.1d            | 1.97 ± 0.05c           | 0.60 ± 0.01b           | 40 ± 1c                 | 5.7 ± 0.1b             | n.d. a                 | n.d. a                 |
| Eremophilene          |       | n.d. a                  | n.d. a                | n.d. a                 | n.d. a                 | 32.3 ± 0.8b             | 1.07 ± 0.03a           | n.d. a                 | n.d. a                 |
|                       | Total | 33 ± 1a<br>0.64%a       | 195 ± 5c<br>6.14%d    | 145 ± 4b<br>2.93%b     | 37 ± 1a<br>3.76%c      | 2330 ± 63c<br>6.28%b    | 764 ± 20b<br>7.95%c    | 50 ± 1a<br>3.02%a      | 16.2 ± 0.4a<br>2.96%a  |

---

|            |       |       |       |      |        |       |       |      |
|------------|-------|-------|-------|------|--------|-------|-------|------|
| Total Vocs | 5209c | 3181b | 4934c | 993a | 37069d | 9607c | 1647b | 548a |
|------------|-------|-------|-------|------|--------|-------|-------|------|

---

Significance, analysis of variance (ANOVA) with the honestly significant difference (HSD) in a Tukey test at different significance levels, between different drying treatments and fresh fruit ( $p < 0.05$ )

n.d.: not determinable
